1 **Crystal structure of inhibitor-bound human MSPL that can activate high**  
2 **pathogenic avian influenza**

3

4 Ayako Ohno<sup>1,\*</sup>, Nobuo Maita<sup>2,\*</sup>, Takanori Tabata<sup>3</sup>, Hikaru Nagano<sup>4</sup>, Kyohei Arita<sup>5</sup>,  
5 Mariko Ariyoshi<sup>6</sup>, Takayuki Uchida<sup>1</sup>, Reiko Nakao<sup>1</sup>, Anayt Ulla<sup>1</sup>, Kosuke Sugiura<sup>1,7</sup>, Koji  
6 Kishimoto<sup>8</sup>, Shigetada Teshima-Kondo<sup>4</sup>, Yuushi Okumura<sup>9</sup> and Takeshi Nikawa<sup>1</sup>

7

8 1. Department of Nutritional Physiology, Institute of Medical Nutrition, Tokushima University  
9 Graduate School, Tokushima, Japan

10 2. Division of Disease Proteomics, Institute of Advanced Medical Sciences, Tokushima  
11 University, Tokushima, Japan

12 3. Laboratory for Pharmacology, Pharmaceutical Research Center, Asahikasei Pharma,  
13 Shizuoka, Japan

14 4. Department of Nutrition, Graduate School of Comprehensive Rehabilitation, Osaka  
15 Prefecture University, Osaka, Japan

16 5. Graduate School of Medical Life Science, Yokohama City University, Kanagawa, Japan

17 6. Graduate School of Frontier Biosciences, Osaka University, Osaka, Japan

18 7. Department of Orthopedics, Institute of Biomedical Sciences, Tokushima University  
19 Graduate School, Tokushima, Japan

20 8. Graduate School of Technology, Industrial and Social Sciences, Tokushima University,  
21 Tokushima, Japan

22 9. Department of Nutrition and Health, Faculty of Nutritional Science, Sagami Women's  
23 University, Kanagawa, Japan

24 Correspondence: okumura\_yushi@isc.sagami-wu.ac.jp (Y Okumura)

25 \* Ayako Ohno and Nobuo Maita contributed equally to this work.

26 Ayako Ohno's present address is Curreio Inc., Tokyo, Japan

27 Nobuo Maita's present address is Institute for Quantum Life Science, National Institute for  
28 Quantum and Radiological Science and Technology, Chiba, Japan

## 29 **Abstract**

30 Infection of certain influenza viruses is triggered when its hemagglutinin (HA) is  
31 cleaved by host cell proteases such as proprotein convertases and type II  
32 transmembrane serine proteases (TTSP). HA with a monobasic motif is cleaved by  
33 trypsin-like proteases, including TMPRSS2 and HAT, while the multibasic motif found in  
34 high pathogenicity avian influenza HA is cleaved by furin, PC5/6, or MSPL. MSPL  
35 belongs to the TMPRSS family and preferentially cleaves [R/K]-K-K-R↓ sequences.  
36 Here, we solved the crystal structure of the extracellular region of human MSPL in  
37 complex with an irreversible substrate-analog inhibitor. The structure revealed three  
38 domains clustered around the C-terminal  $\alpha$ -helix of the SPD. The inhibitor structure  
39 and its putative model show that the P1-Arg inserts into the S1 pocket, whereas the  
40 P2-Lys and P4-Arg interacts with the Asp/Glu-rich 99-loop that is unique to MSPL.  
41 Based on the structure of MSPL, we also constructed a homology model of TMPRSS2,  
42 which is essential for the activation of the SARS-CoV-2 spike protein and infection. The  
43 model may provide the structural insight for the drug development for COVID-19.  
44

## 45 **Introduction**

46 Mosaic serine protease large form (MSPL), and its splice variant TMPRSS13, was  
47 originally identified from a human lung cDNA library and is a member of the type II  
48 transmembrane serine proteases (TTSPs) (Kim et al, 2001; Kido & Okumura, 2008).  
49 TTSPs comprise a transmembrane domain near the N-terminus and a trypsin-like  
50 serine protease domain at the C-terminus. Human MSPL is expressed in lung, placenta,  
51 pancreas, and prostate (Kim et al, 2001). MSPL is reported to cleave the spike protein  
52 of porcine epidemic diarrhea virus (PEDV) (Shi et al, 2017), MERS- and SARS-CoV  
53 (Zmora et al, 2014), certain influenza virus HAs (Okumura et al, 2010), and pro-  
54 hepatocyte growth factor (Hashimoto et al, 2010), but the physiological function of  
55 MSPL is poorly understood. TTSPs share a similar overall organization comprising an N-  
56 terminal cytoplasmic domain, transmembrane region, and stem/catalytic domains at  
57 the C-terminus (Szabo & Bugge, 2008). All TTSPs are synthesized as single-chain  
58 zymogens and are subsequently activated into the two-chain active forms by cleavage  
59 within the highly conserved activation motif. The two chains are linked by a disulfide  
60 bridge so that TTSPs remain bound to the cell membrane (Bugge et al, 2009). The  
61 catalytic domain contains a highly conserved 'catalytic triad' of three amino acids (His,  
62 Asp, and Ser). Like all other trypsin-like serine proteases, MSPL possesses a conserved  
63 Asp residue on the bottom of the S1 substrate-binding pocket, therefore, it accepts  
64 substrates with Arg or Lys in the P1 position. Based on similarities in the domain  
65 structure, the serine protease domain, TTSPs are classified into four subfamilies:  
66 hepsin/TMPRSS, matriptase, HAT/DESC, and corin (Szabo & Bugge, 2008, 2011; Antalis  
67 et al, 2011; Böttcher-Friebertshäuser, 2018). MSPL belongs to the hepsin/TMPRSS  
68 subfamily. In this subfamily, hepsin and spinesin (TMPRSS5) contain a single scavenger

69 receptor cysteine-rich repeat (SRCR) domain in the stem region, while MSPL, TMPRSS2,  
70 -3, and -4 contain an additional low-density lipoprotein receptor A (LDLA) domain near  
71 the single SRCR domain in the stem region (Szabo & Bugge, 2011; Antalis et al, 2011).  
72 Furthermore, enteropeptidase has additional insertions of SEA, LDLA, CUB, MAM, and  
73 CUB domains between the transmembrane and the LDLA domain (Kitamoto et al,  
74 1994). The SRCR domain has approximately 100–110 amino acids that adopt a compact  
75 fold consisting of a curved  $\beta$ -sheet wrapped around an  $\alpha$ -helix, and is stabilized by 2-4  
76 disulfide bonds. Depending on the number and the position of the cysteine residues,  
77 the SRCR domain has been divided into three subclasses (group A, B, and C) (Ojala et  
78 al, 2007). The canonical LDLA domain contains approximately 40 amino acids and  
79 contains six conserved cysteine residues that are involved in the formation of disulfide  
80 bonds. The LDLA domain also contains a calcium ion coordinated with six highly  
81 conserved residues near the C-terminus. Together, the disulfide bonds and calcium-  
82 binding stabilize the overall structure of the LDLA domain (Daly et al, 1995).

83 Limited proteolysis of the glycoprotein on the viral surface mediated by a host  
84 protease is a key step in facilitating viral infection. The influenza viral hemagglutinin  
85 (HA0) is cleaved by various host proteases and divided into HA1 and HA2 subunits,  
86 where HA1 mediates host cell binding as well as the initiation of endocytosis and HA2  
87 controls viral-endosomal membrane fusion (Hamilton et al, 2012). Previous studies  
88 show that TMPRSS2, -4, DESC1, HAT, and MSPL activate the influenza virus by cleaving  
89 HA0 (reviewed in Antalis et al, 2011, and Böttcher-Friebertshäuser, 2018; Böttcher et  
90 al, 2006; Chaipan et al, 2009; Okumura et al, 2010; Ohler & Becker-Pauly, 2012;  
91 Böttcher-Friebertshäuser et al, 2013; Zmora et al, 2014). A newly synthesized HA is  
92 cleaved during its transport to the plasma membrane in the trans-Golgi network by

93 furin or TMPRSS2, whereas HAT cleaves it at the cell surface during viral budding  
94 (reviewed in Böttcher-Friebertshäuser, 2018). There are two types of cleavage site  
95 sequences; monobasic motifs have single or discrete basic residues such as [Q/E]-[T/X]-  
96 R↓ or R-X-X-R↓ (vertical arrow indicates the cleavage position), and multibasic motifs  
97 are composed of Lys/Arg-rich sequences such as R-X-[K/R]-R↓. The multibasic motif is  
98 found in highly pathogenic avian influenza virus (HPAIV), and is mainly cleaved by furin,  
99 PC5/6 (Stieneke-Gröber et al, 1992; Horimoto et al, 1994), and MSPL (Kido et al, 2009).  
100 Some HPAIV variants, such as H5N2 (Lee et al, 2004) and H7N3 (Bulach et al, 2010)  
101 have the multibasic motif with Lys at the P4 position (K-K-K-R↓), and these HA  
102 proteins are not cleaved by furin nor PC5/6, but MSPL (Thomas, 2002; Remacle et al,  
103 2008; Kido et al, 2009). Therefore, MSPL is a key protease to protect humans from an  
104 outbreak of novel avian influenza A virus.

105 To date, the extracellular region of human hepsin (Somoza et al, 2003; Herter et al,  
106 2005) and SPD of enteropeptidase (Lu et al, 1999; Simeonov et al, 2012) are the only  
107 structures reported among the hepsin/TMPRSS family. The crystal structure of hepsin  
108 revealed that the SRCR domain is located at the opposite side of the active site of SPD,  
109 and these domains are splayed apart. Because hepsin lacks the LDLA domain, the  
110 relative orientation of the LDLA, SRCR, and SP domains in other members of the  
111 hepsin/TMPRSS family is unknown. To elucidate the spatial arrangement of the three  
112 domains and multibasic motif recognition, we determined the crystal structure of the  
113 extracellular region of human MSPL in complex with the irreversible peptidic inhibitor  
114 decanoyl-RVKR-cmk at 2.6 Å resolution.

115 To our surprise, the overall structure of MSPL reveals that the spatial arrangement of  
116 the SRCR and SP domains in MSPL is markedly different from that of hepsin. Although  
117 the inhibitor adopts an artificial conformation due to crystal packing, the predicted  
118 peptide model explains how MSPL is able to recognize both Lys or Arg as P4 residues.  
119 In addition, we constructed a homology model of human TMPRSS2, which is reported  
120 to cleave the spike protein of SARS-CoV-2 (Hoffmann et al, 2020a,b; Bestle et al, 2020).  
121 The human TMPRSS2 model reveals a wide binding cleft at the S1' position, suggesting  
122 that TMPRSS2 can capture the target peptides of flexible conformations.

123

## 124 **Results**

### 125 *Overall structure of the human MSPL extracellular region*

126 The extracellular region of human MSPL is composed of an LDLA domain (residues 203-  
127 226), an SRCR domain (residues 227-317) and a serine protease domain (residues 326-  
128 561) (Fig 1A). We expressed and purified the extracellular region (residues 187-586) of  
129 human MSPL and crystallized the protein with decanoyl-RVKR-cmk, which is known as  
130 furin inhibitor I. Diffraction data were collected at the Photon Factory AR-NE3a  
131 (Tsukuba, Japan) and the structure was solved to a resolution of 2.6 Å (Fig 1B and Table  
132 S1). This is the first published structure of an LDLA-containing hepsin/TMPRSS  
133 subfamily protein. The refined model contains the human MSPL with the residue range  
134 of 193-563, decanoyl-RVKR-cmk, and a calcium ion (Fig S1B). Residues of 187-192, 324-  
135 325, and 564-586 regions were missing due to disorder. There are four potential *N*-  
136 glycosylation sites, and two *N*-glycans attached to Asn255 and Asn405 were observed,  
137 but no phosphorylated residues were found (Murray et al, 2017).

138 The extracellular region of human MSPL is composed of the non-catalytic portion of  
139 the N-terminal region (LDLA and SRCR domain) and the SPD at the C-terminus (Fig 1B).  
140 The three domains are linked to each other by disulfide bonds. The human MSPL is  
141 activated by hydrolytic cleavage at Arg325-Ile326 then residues in the 326-586 region  
142 are converted to the mature SPD (Okumura et al, 2010). Ile326 (Ile16 in chymotrypsin;  
143 hereafter, the residue numbers in parentheses denote the corresponding  
144 chymotrypsin residue number, see Fig 3B) is located in a pocket where the N atom  
145 interacts with the side chain of Asp510(194) (Fig S1A). Therefore, this structure could  
146 represent the active form in which human MSPL is processed by an intrinsic protease

147 during expression in the cell. The LDLA domain of human MSPL is 24 residues in length  
148 and composed of two turns and a short  $\alpha$ -helical region. A canonical LDLA domain has  
149 an N-terminal antiparallel  $\beta$ -sheet and three disulfide bonds (Daly et al, 1995).  
150 Therefore, the LDLA of human MSPL lacks half of the canonical N-terminal region.  
151 Because the SRCR domain of human MSPL has only two disulfide bonds, it does not  
152 belong to either group A or B (Sarrias et al, 2004). Intriguingly, the 3D structures of the  
153 SRCR domains of human MSPL and hepsin are very similar despite their low level of  
154 sequence homology (23% sequence identity), suggesting that the SRCR domain of  
155 MSPL belongs to group C (Ojala et al, 2007).

156 To date, 3D structures of SRCR-SPD of hepsin (PDB entry: 1P57 & 1Z8G) and SPD of  
157 enteropeptidase (PDB entry: 1EKB & 4DGJ) have been reported in the same  
158 hepsin/TMPRSS subfamily. Here, we compared the structures of human MSPL and  
159 hepsin (Figs 1A and 2A-C). The root-mean-square deviation of the two SPDs (r.m.s.d. of  
160 C $\alpha$  atoms = 0.637 Å), as well as the SRCR domains (r.m.s.d. of C $\alpha$  atoms = 0.988 Å), are  
161 quite small. Although the SPD and SRCR domains of human MSPL and hepsin are  
162 almost identical, the arrangement of each domain with respect to each other is  
163 markedly different (Fig 2B). Specifically, when the 3D structures of SPD from hepsin  
164 and human MSPL are fitted, the SRCR domain of MSPL is rotated by  $\sim$ 80 degrees  
165 relative to that of hepsin. The difference may be caused by the presence of the LDLA  
166 domain in human MSPL. The LDLA, SRCR, and SP domains of human MSPL are more  
167 tightly packed than in hepsin, where these domains are splayed apart. Accordingly, a  
168 short parallel  $\beta$ -sheet between the N-terminal segment and the SP domain was  
169 observed in human MSPL, whereas the C-terminal end of hepsin forms an antiparallel  
170  $\beta$ -sheet (Fig 2A).



171 There are only six residues between the transmembrane domain and the N-terminal  
172 Thr193 residue of our structural model. Hence, the extracellular region of human MSPL  
173 must be located very close to the plasma membrane. Indeed, the region that was  
174 predicted to be close to the plasma membrane is enriched in basic residues, such as  
175 Arg196, Lys198, Lys218, Lys220, and Arg561(245) (Fig 2C). The extracellular region of  
176 hepsin is also thought to lie flat against the plasma membrane (Somoza et al, 2003).  
177 Hence, both MSPL and hepsin may bind substrate in close proximity to the  
178 transmembrane region. However, the extracellular region of human MSPL is oriented  
179 in the opposite way with respect to that of hepsin.

180

#### 181 *Interaction of the inhibitor decanoyl-RVKR-cmk in the active site of human MSPL*

182 As expected, the SPD of human MSPL displays the conserved architecture of the  
183 trypsin- and chymotrypsin-like (S1A family) serine proteases (Fig 1B). In the activated  
184 human MSPL, Ile326(16) at the cleavage site forms a salt bridge with the conserved  
185 Asp510(194) residue located immediately prior to the catalytic Ser511(195) residue  
186 (Fig S1A). This interaction is generated by the activating cleavage (Stubbs et al, 1998)  
187 as observed in hepsin (Somoza et al, 2003) and other TTSP family members (Lu et al,  
188 1999; Kyrieleis et al, 2007). Formation of the S1 pocket and oxyanion hole comes about  
189 via a conformational change in the nearby hairpin loop (189-loop) (Khan & James,  
190 1998). This “Ile16-Asp194 salt-bridge” is a common feature among the trypsin-like  
191 proteases (Halfon & Craik, 1998). The chloromethyl group of the inhibitor irreversibly  
192 alkylates His366(57) of the SPD of human MSPL, in addition, a hemiketal is formed to  
193 the active site Ser511(195). In addition, several interactions via the P1-Arg and P2-Lys

194 side chains are formed (Figs 1C and 3A). Covalent interaction between the decanoyl-  
195 RVKR-cmk inhibitor and catalytic residues (His366(57), Ser511(195)) occurs via a  
196 nucleophilic attack on the cmk moiety. P1-Arg inserts into the deep S1 pocket, and its  
197 carbonyl oxygen atom directly binds to the backbone amides of the oxyanion hole  
198 (Gly509(193) and Ser511(195)). In addition, the guanidino group of P1-Arg forms a salt  
199 bridge with the side chain of Asp505(189), as well as a hydrogen bond with the side  
200 chain of Ser506(190). Asp505(189) is located at the bottom of the S1 pocket. These  
201 residues are highly conserved among the hepsin/TMPRSS subfamily (Fig 5). The  
202 interaction between P1-Arg and human MSPL is characteristic of trypsin-like serine  
203 proteases. However, P2-Lys interacts with basic residues located at the 99-loop  
204 (chymotrypsin numbering) next to the catalytic residue Asp414(102). The N $\zeta$  of P2-Lys  
205 forms five hydrogen bonds with the backbones of Asp408(96) and Glu410(98), the side  
206 chains of Tyr406(94) and Asp411(99) and a water molecule. This water molecule also  
207 mediates hydrogen bonding interactions with the side chains of Asp411(99) and the  
208 catalytic Asp414(102) residue. Interestingly, with the exception of catalytic  
209 Asp414(102), residues that interact with the side chain of P2-Lys are not conserved  
210 among the hepsin/TMPRSS subfamily (Fig 5, cyan dot). Compared with P1-Arg and P2-  
211 Lys, there are no distinct interactions between the side chains of P3-Val/P4-Arg and  
212 the human MSPL. The backbone carbonyl of P3-Val forms a hydrogen bond with the  
213 backbone amide of Gly532(216). The side chain of P3-Val makes hydrophobic  
214 interactions with Trp531(225) and Gly532(216). By contrast, the backbone of P4-Arg  
215 forms no hydrogen bonds with the human MSPL but with the Asp472(160) of  
216 crystallographic symmetrical subunit (see below). The N-terminal decanoyl moiety  
217 makes hydrophobic interactions with Gln537(221) at the 220-loop (chymotrypsin

218 numbering). One ordered sulfate ion is located in close proximity to both P3-Val and  
219 P4-Arg where it forms hydrogen bonds with the backbone amides of P2-Lys and P3-Val.  
220 Although the model is well fitted to the electron density (Fig 1C), the P3-P4 moiety of  
221 decanoyl-RVKR-cmk bound at human MSPL seems to be in an abnormal conformation  
222 compared to other substrate peptides bound to S1A family members (Perona & Craik,  
223 1997; Debela et al, 2007; Herter et al, 2005). In most cases, the backbone nitrogen and  
224 oxygen atoms of the P3 residue interact with glycine (Gly216 in chymotrypsin) to form  
225 an antiparallel  $\beta$ -sheet interaction (Perona & Craik, 1997). However, the nitrogen atom  
226 at P3-Val does not interact with the oxygen atom at Gly532(216) (Fig 3A). Closer  
227 inspection of the structure reveals an abnormal conformation of the P3-P4 moiety,  
228 most likely arising from crystal packing. We observed that the guanidino group of P4-  
229 Arg tightly interacts with Asp472(160) in the symmetrical subunit, and the sulfate ion  
230 stabilizes the conformation (Fig 4A). Therefore, we suspect that the P3-P4 portion of  
231 the inhibitor peptide in our structure does not reflect the proper binding  
232 conformation. We therefore built a putative model of the target peptide based on the  
233 acetyl-KQLR-cmk structure bound to human hepsin (PDB entry: 1Z8G, Herter et al,  
234 2005) (Figs 4B and C and S2A-D). In this model, the guanidino group of P4-Arg is in  
235 close proximity to the negatively-charged region around the 99-loop (Glu409(97),  
236 Glu410(98), Asp411(99)) and Tyr489(175). Because these residues are unique to MSPL,  
237 the structure may explain why this enzyme shows a target preference for the P4-  
238 Arg/Lys sequence.  
239

240 *Comparison of the binding mechanisms of decanoyl-RVKR-cmk inhibitor to human*

241 *MSPL and furin*

242 The crystal structure of the decanoyl-RVKR-cmk inhibitor in complex with mouse furin  
243 has been determined (Henrich et al, 2003). Although furin also has the same Ser-His-  
244 Asp catalytic triad as MSPL, its catalytic domain belongs to the superfamily of  
245 subtilisin-like serine proteases (Siezen et al, 1997). The catalytic domain of furin has a  
246 different overall fold from that of human MSPL, which belongs to the trypsin- and  
247 chymotrypsin-like (S1A family) serine protease family. Despite the different overall fold  
248 of human MSPL and furin, decanoyl-RVKR-cmk inhibits both enzymes. Therefore, we  
249 compared the structure of the human MSPL-bound decanoyl-RVKR-cmk inhibitor with  
250 that of the furin-bound inhibitor (Figs 6A and B). Except for the P1-Arg and P2-Lys, they  
251 are not superimposed. In the human MSPL:decanoyl-RVKR-cmk complex structure, the  
252 inhibitor exhibits a bend at the P3-Val. By contrast, in the furin:decanoyl-RVKR-cmk  
253 complex structure, the inhibitor fits an extended conformation. As a consequence, the  
254 P1, P2, and P4 site contacts with furin, whereas the P3 side chain is directed into the  
255 solvent. As described earlier, the P3 and P4 site of decanoyl-RVKR-cmk bound to MSPL  
256 is most likely an artifact. Compared with the putative model of the MSPL-bound  
257 inhibitor, the P1-P3 site is almost identical, whereas the side chain of P4-Arg is in the  
258 opposite orientation (Figs 6C and D). As the S4 site of furin is optimized for Arg binding,  
259 furin shows reduced affinity for the P4-Lys sequence (Henrich et al, 2003). However,  
260 the S4 site of MSPL comprises a wide negatively-charged surface that is suitable for  
261 multibasic motif binding (Fig 4C).

262

## 263 Discussion

264 By the end of January 2021, the SARS-CoV-2 pandemic has killed more than 2.2 million  
265 people (<https://ourworldindata.org/covid-deaths>) and resulted in a worldwide  
266 recession as people were forced to socially distance. The infection of SARS-CoV-2  
267 requires cleavage at the S1/S2 site by furin, followed by cleavage at the S2' site by  
268 TMPRSS2 (Hoffmann et al, 2020a,b; Bestle et al, 2020). TMPRSS2 displays low  
269 sequence preference for the P2-P4 position (Böttcher et al, 2006; Baron et al, 2013).  
270 The reason for TMPRSS2 mediated specific cleavage of the S2' site is therefore unclear.  
  
271 To date, the experimental structure of TMPRSS2 has not been reported. However,  
272 human MSPL shares 45% amino acid identity with TMPRSS2. Consequently, there is  
273 sufficient similarity to build a reliable homology model of human TMPRSS2 using MSPL  
274 as template (Fig 7A). Eight out of nine disulfide bonds are conserved (Fig 5), and the  
275 relative domain alignment of human TMPRSS2 is similar to that of MSPL. However, the  
276 SP domain, specifically at the  $\beta$ 12- $\beta$ 13 loop region (60-loop in chymotrypsin), displays  
277 significant differences (Fig 7A). These structural changes result in a wide substrate-  
278 binding cleft (Fig7B), so that human TMPRSS2 may be able to capture the target  
279 peptides of not only a stretched conformation but also flexible conformations.  
  
280 Furthermore, Asp411, one of the important residues for P2-Lys and P4-Arg recognition  
281 found in MSPL, is replaced by Lys225 in TMPRSS2 (Figs 4B and 5). This substitution  
282 leads to a reduced negatively-charged region on the S3-S5 site (Fig 7B). Nonetheless,  
283 the electrostatic surface potential of the S2 site in TMPRSS2 is still negatively-charged  
284 (Fig 7B) and able to participate in P2-Lys binding.

285 Our structure also helps to predict the tertiary structure of TMPRSS3, the gene  
286 responsible for autosomal recessive nonsyndromic deafness. Mutations identified in  
287 patients with this syndrome were mapped onto a homology model of TMPRSS3 to  
288 better understand the disease. Seven missense TMPRSS3 mutants (D103G, R109W,  
289 C194F, R216L, W251C, P404L, and C407R) associated with deafness in humans were  
290 unable to activate the ENaC (Wattenhofer et al, 2005; Antalis et al, 2010). One of  
291 seven missense mutants associated with the loss of hearing, D103G, was found in the  
292 LDLA domain of human TMPRSS3 (Guipponi et al, 2002; Wattenhofer et al, 2005).  
293 Because Asp103 in human TMPRSS3 corresponds to Asp222 in human MSPL, the LDLA  
294 structure stabilized by calcium-binding may be important for the function of the  
295 protein (Fig S1B). Indeed, the mutations in LDLA and SRCR (D103G, R109W, and C194F)  
296 as well as the SPD of human TMPRSS3 affect its autoactivation by proteolytic cleavage  
297 at the junction site between the SRCR and the SP domains (Guipponi et al, 2002).

298 In summary, we have elucidated the structure of the extracellular domain of human  
299 MSPL and its spatial arrangement of three (LDLA, SRCR, and SP) domains, as well as the  
300 substrate sequence specificity of human MSPL. These findings will be useful in  
301 designing novel anti-influenza drugs that prevent HPAI virus uptake into the host cell.  
302 Human MSPL also contributes to the cleavage and activation of severe acute  
303 respiratory syndrome coronavirus (SARS-CoV) Middle East respiratory syndrome  
304 coronavirus (MERS-CoV) spike proteins (Zmora et al, 2014).

305 The mechanism of infection of SARS-CoV-2 needs to be elucidated as a matter of  
306 urgency. The MSPL structure shares the highest sequence homology to TMPRSS2  
307 among the experimentally solved structures. The homology model presented in this

308 paper provides novel insight into TMPRSS2 function. However, it is still necessary to

309 solve the structure of TMPRSS2.

310

311 Note Added in Proof

312 Recent studies have shown that TMPRSS13/MSPL is involved in the cleavage of the

313 spike protein of SARS-CoV-2 as the same extent as TMPRSS2 (Hoffman et al, 2021;

314 Kishimoto et al, 2021).

315

## 316 **Materials and Methods**

### 317 *Expression and purification of human MSPL*

318 Soluble recombinant human MSPL was generated using a previously established stable  
319 cell line expressing human MSPL (Okumura et al, 2010), which accumulated in serum-  
320 free culture medium (SFCM). It should be noted that the human MSPL we used here is  
321 a splice variant (GenBank id: BAB39741) of the canonical sequence that includes the  
322 single amino acid substitution L586V. Approximately 10 L of SFCM was concentrated  
323 by ultrafiltration using a Pellicon XL 50 (Merck-Millipore, Billerica, MA). The resulting  
324 SFCM was applied to an Anti-FLAG M2 agarose gel equilibrated in 50 mM Tris-HCl, 150  
325 mM NaCl, pH 7.4 (TBS). Bound protein was subsequently eluted in 0.1 M glycine-HCl,  
326 pH 3.5, and fractions containing recombinant human MSPL pooled and dialyzed into  
327 phosphate-buffered saline (PBS).

328

### 329 *Complex formation, crystallization, and data collection*

330 The peptide inhibitor (decanoyl-RVKR-cmk) was purchased from Merck-Millipore  
331 (Billerica, MA) and reconstituted in dimethyl sulfoxide (DMSO). Human MSPL:inhibitor  
332 complex was formed by incubating purified human MSPL (6.1 mg/mL) with a 4-fold  
333 molar excess of decanoyl-RVKR-cmk at 4 °C for 5 min and then centrifuged (25,000 g)  
334 at 4 °C, for 5 min to remove the precipitate. Crystallization screening was performed  
335 by mixing 1 µL of the human MSPL:inhibitor solution with 1 µL of reservoir solution  
336 using the hanging-drop vapor diffusion method. The human MSPL:inhibitor complex  
337 was crystallized at 15 °C with a reservoir solution composed of 0.1 M HEPES (pH 7.5),  
338 2.4 M ammonium sulfate. Prior to data collection, the single crystal was transferred to



339 the cryoprotectants [20% (v/v) glycerol and 80% (v/v) of the reservoir] for five seconds,  
340 and then flash-frozen in liquid nitrogen. The diffraction dataset for the human  
341 MSPL:decanoyl-RVKR-cmk crystal was collected at beamline NE3A in the Photon  
342 Factory Advanced Ring (PF-AR). The crystal belonged to space group  $P2_12_12_1$  with unit  
343 cell parameters  $a = 55.84$ ,  $b = 62.40$ , and  $c = 171.63$  Å. Diffraction data were processed  
344 using the program *iMosflm* (Battye et al, 2011), followed by *Aimless* (Evans &  
345 Murshudov, 2013). Data collection statistics are summarized in Table S1.

346

#### 347 *Structure determination and refinement of the human MSPL:inhibitor peptide complex*

348 The structure of the complex was solved by the molecular replacement method using  
349 the program MolRep (Vagin & Teplyakov, 2010), with SPD of human plasma kallikrein  
350 (PDB entry: 2ANY; Tang et al, 2005), which shows the highest sequence identity score  
351 (46.1%), as a search model. The model of SPD was manually fixed with *COOT* (Emsley &  
352 Cowtan, 2004) and refined with Refmac5 (Murshudov et al, 2011). When the SPD of  
353 human MSPL was well refined, the interpretable electron density of the unmodeled  
354 region was observed, then the model of the LDLA and SRCR domains was manually  
355 built. The final model contained human MSPL, decanoyl-RVKR-cmk, four sugars, 80  
356 ions, and 65 water molecules, with *R*-work and *R*-free values of 18.5% and 25.1%,  
357 respectively. The refinement statistics are summarized in Table S1. In the human  
358 MSPL:peptide inhibitor complex, some residues (N-terminal 3xFLAG-tag and His192,  
359 Gly324, Arg325, and C-terminal Gln564-Val 586) are missing due to disorder. All the  
360 structures in the figures were prepared using PyMOL v1.5.0 (<http://www.pymol.org/>).

361 The MSPL:peptide inhibitor interfaces were analyzed using LigPlot+ (Laskowski &  
362 Swindells, 2011).

363

364 *Homology modelling of human TMPRSS2*

365 The sequence alignment of the extracellular region of human MSPL and human  
366 TMPRSS2 was obtained using the BLAST web server (<https://www.uniprot.org/blast/>).  
367 The amino acid identity of extracellular regions between human MSPL and human  
368 TMPRSS2 was 39.8% with a score of 704, and E-value of 1.1e-86. The homology model  
369 of human TMPRSS2 was build using *MODELLER* (Šali & Blundell, 1993). Electrostatic  
370 surface potentials were calculated using the APBS server  
371 (<http://server.poissonboltzmann.org/>).

372

### 373 **Data Availability**

374 The coordinates and structure factors of the human MSPL:decanoyl-RVKR-cmk  
375 inhibitor complex have been deposited to the RCSB Protein Data Bank (PDB entry:  
376 6KD5). The homology model of human TMPRSS2 is available from supplementary  
377 materials.

378

### 379 **Acknowledgments**

380 We thank the beamline staff at the PF-AR and SPring-8 BL44XU for supporting data  
381 collection under the proposal number 2013G075 and 20156537, respectively. This  
382 work is supported by the Japan Society for the Promotion of Science (JSPS) KAKENHI

383 grant number 15J40096 to A Ohno, 15K13747 & 19K05696 to N Maita, 15K09585 &  
384 18K08453 to Y Okumura, and 18H04981 & 19H04054 to T Nikawa, and by AMED-CREST  
385 grant number JP19gm0810009h0104 to T Nikawa from Japan Agency for Medical  
386 Research and Development (AMED).

387

### 388 **Author Contributions**

389 A Ohno: investigation, data curation, formal analysis, funding acquisition,  
390 methodology, and writing—original draft.

391 N Maita: formal analysis, investigation, funding acquisition, data curation, visualization,  
392 and writing—review, and editing.

393 T Tabata: investigation and methodology.

394 H Nagano: methodology.

395 K Arita: formal analysis and validation.

396 M Ariyoshi: validation, and writing—review and editing.

397 T Uchida: formal analysis and validation.

398 R Nakao: formal analysis and validation.

399 A Ulla: formal analysis and validation.

400 K Sugiura: formal analysis and validation.

401 K Koji: formal analysis and validation.

402 S Teshima-Kondo: formal analysis and validation.

403 Y Okumura: conceptualization, resources, supervision, funding acquisition,  
404 methodology, project administration, and writing—original draft, review, and editing.

405 T Nikawa: supervision and funding acquisition.

406

### 407 **Conflict of interest**

408 The authors declare that they have no conflict of interest.

## 409 **References**

- 410 Antalis TM, Bugge TH, Wu Q (2011) Membrane-anchored serine proteases in health and  
411 disease. *Prog Mol Biol Transl Sci* 99: 1-50. doi:10.1016/B978-0-12-385504-6.00001-4
- 412 Antalis TM, Buzza MS, Hodge KM, Hooper JD, Netzel-Arnett S (2010) The cutting edge:  
413 membrane-anchored serine protease activities in the pericellular microenvironment. *Biochem J*  
414 428: 325–346. doi:10.1042/BJ20100046
- 415 Baron J, Tarnow C, Mayoli-Nüssle D, Schilling E, Meyer D, Hammami M, Schwalm F, Steinmetzer  
416 T, Guan Y, Garten W, et al. (2013) Matriptase, HAT, and TMPRSS2 activate the hemagglutinin  
417 of H9N2 influenza A viruses. *J Virol* 87: 1811-1820. doi:10.1128/JVI.02320-12
- 418 Battye TG, Kontogiannis L, Johnson O, Powell HR, Leslie AG (2011) iMOSFLM: a new graphical  
419 interface for diffraction-image processing with MOSFLM. *Acta Crystallogr D Biol Crystallogr* 67:  
420 271-281. doi:10.1107/S0907444910048675
- 421 Bestle D, Heindl MR, Limburg H, Van Lam van T, Pilgram O, Moulton H, Stein DA, Hardses K,  
422 Eickmann M, Dolnik O, et al. (2020) TMPRSS2 and furin are both essential for proteolytic  
423 activation of SARS-CoV-2 in human airway cells. *Life Sci Alliance* 3: e202000786.  
424 doi:10.26508/lsa.202000786
- 425 Böttcher E, Matrosovich T, Beyerle M, Klenk HD, Garten W, Matrosovich M (2006). Proteolytic  
426 activation of influenza viruses by serine proteases TMPRSS2 and HAT from human airway  
427 epithelium. *J Virol* 80: 9896–9898. doi:10.1128/JVI.01118-06
- 428 Böttcher-Friebertshäuser E (2018) Membrane-Anchored Serine Proteases: Host Cell Factors in  
429 Proteolytic Activation of Viral Glycoproteins. *Activation of Viruses by Host Proteases*. 153-203.  
430 doi:10.1007/978-3-319-75474-1\_8
- 431 Böttcher-Friebertshäuser E, Klenk HD, Garten W (2013) Activation of influenza viruses by  
432 proteases from host cells and bacteria in the human airway epithelium. *Pathog Dis* 69: 87-100.  
433 doi:10.1111/2049-632X.12053
- 434 Bugge TH, Antalis TM, Wu Q (2009) Type II transmembrane serine proteases. *J Biol Chem* 284:  
435 23177-23181. doi:10.1074/jbc.R109.021006
- 436 Bulach D, Halpin R, Spiro D, Pomeroy L, Janies D, Boyle DB (2010) Molecular Analysis of H7  
437 Avian Influenza Viruses from Australia and New Zealand: Genetic Diversity and Relationships  
438 from 1976 to 2007. *J Virol* 84: 9957-9966. doi:10.1128/JVI.00930-10

- 439 Chaipan C, Kobasa D, Bertram S, Glowacka I, Steffen I, Tsegaye TS, Takeda M, Bugge TH, Kim  
440 S, Park Y, et al. (2009) Proteolytic activation of the 1918 influenza virus hemagglutinin. *J Virol*  
441 83: 3200–3211. doi:10.1128/JVI.02205-08
- 442 Daly NL, Scanlon MJ, Djordjevic JT, Kroon PA, Smith R (1995) Three-dimensional structure of a  
443 cysteine-rich repeat from the low-density lipoprotein receptor. *Proc Natl Acad Sci U S A* 192:  
444 6334-6338. doi:10.1073/pnas.92.14.6334
- 445 Debela M, Goettig P, Magdolen V, Huber R, Schechter NM, Bode W (2007) Structural basis of  
446 the zinc inhibition of human tissue kallikrein 5. *J Mol Biol* 373: 1017–1031.  
447 doi:10.1016/j.jmb.2007.08.042
- 448 Emsley P, Cowtan K (2004) Coot: model-building tools for molecular graphics. *Acta Crystallogr D*  
449 *Biol Crystallogr* 60: 2126-2132. doi:10.1107/S0907444904019158
- 450 Evans PR, Murshudov GN (2013) How good are my data and what is the resolution? *Acta*  
451 *Crystallogr D Biol Crystallogr* 69: 1204-1214. doi:10.1107/S0907444913000061
- 452 Gouet P, Robert X, Courcelle E (2003) ESPript/ENDscript: extracting and rendering sequence  
453 and 3D information from atomic structures of proteins. *Nucl Acids Res* 31: 3320-3323.  
454 doi:10.1093/nar/gkg556
- 455 Guipponi M, Vuagniaux G, Wattenhofer M, Shibuya K, Vazquez M, Dougherty L, Scamuffa N,  
456 Guida E, Okui M, Rossier C, et al. (2002) The transmembrane serine protease (TMPRSS3)  
457 mutated in deafness DFNB8/10 activates the epithelial sodium channel (ENaC) *in vitro*. *Hum Mol*  
458 *Genet* 11: 2829-2836. doi:10.1093/hmg/11.23.2829
- 459 Halfon S, Craik CS (1998) Family S1 of trypsin (clan SA). In Ed. A. J. Barrett, N.D. Rawlings, &  
460 J.F. Woessner. *Handbook of Proteolytic Enzymes*. Academic Press: San Diego, pp. 5-12.
- 461 Hamilton BS, Whittaker GR, Daniel S (2012) Influenza Virus-Mediated Membrane Fusion:  
462 Determinants of Hemagglutinin Fusogenic Activity and Experimental Approaches for Assessing  
463 Virus Fusion. *Viruses* 4: 1144-1168. doi:10.3390/v4071144
- 464 Hashimoto T, Kato M, Shimomura T, Kitamura N (2010) TMPRSS13, a type II transmembrane  
465 serine protease, is inhibited by hepatocyte growth factor activator inhibitor type 1 and activates  
466 pro-hepatocyte growth factor. *FEBS J* 277: 4888–4900. doi:10.1111/j.1742-  
467 4658.2010.07894.x
- 468 Henrich S, Cameron A, Bourenkov GP, Kiefersauer R, Huber R, Lindberg I, Bode W, Than ME  
469 (2003) The crystal structure of the proprotein processing proteinase furin explains its stringent  
470 specificity. *Nat Struct Biol* 10: 520-526. doi:10.1038/nsb941

- 471 Herter S, Piper DE, Aaron W, Gabriele T, Cutler G, Cao P, Bhatt AS, Choe Y, Craik CS, Walker  
472 N, et al. (2005) Hepatocyte growth factor is a preferred in vitro substrate for human hepsin, a  
473 membrane-anchored serine protease implicated in prostate and ovarian cancers. *Biochem J* 390:  
474 125-136. doi:10.1042/BJ20041955
- 475 Hoffmann M, Kleine-Weber H, Schroeder S, Krüger N, Herrler T, Erichsen S, Schiergens TS,  
476 Herrler G, Wu NH, Nitsche A, et al. (2020a) SARS-CoV-2 Cell Entry Depends on ACE2 and  
477 TMPRSS2 and Is Blocked by a Clinically Proven Protease Inhibitor. *Cell* 181, 271–280.  
478 doi:10.1016/j.cell.2020.02.052
- 479 Hoffmann M, Kleine-Weber H, Pöhlmann S (2020b) A Multibasic Cleavage Site in the Spike  
480 Protein of SARS-CoV-2 Is Essential for Infection of Human Lung Cells. *Mol Cell* 78: 779–784.  
481 doi:10.1016/j.molcel.2020.04.022
- 482 Hoffmann M, Hofmann-Winkler H, Smith JC, Krüger N, Arora P, Sørensen LK, Søgaard OS,  
483 Hasselstrøm JB, Winkler M, Hempel T, et al. (2021) Camostat mesylate inhibits SARS-CoV-2  
484 activation by TMPRSS2-related proteases and its metabolite GBPA exerts antiviral activity.  
485 *EBioMedicine* in press. doi:10.1016/j.ebiom.2021.103255
- 486 Horimoto T, Nakayama K, Smeekens SP, Kawaoka Y (1994) Proprotein-processing  
487 endoproteases PC6 and furin both activate hemagglutinin of virulent avian influenza viruses. *J*  
488 *Virology* 68: 6074-6078. doi:10.1128/JVI.68.9.6074-6078
- 489 Khan AR, James MNG (1998) Molecular mechanisms for the conversion of zymogens to active  
490 proteolytic enzymes. *Prot Sci* 7:815-836. doi:10.1002/pro.5560070401
- 491 Kido H, Okumura Y (2008) MSPL/TMPRSS13. *Front Biosci* 13: 754-758. doi:10.2741/2717
- 492 Kido H, Okumura Y, Takahashi E, Pan HY, Wang S, Chida J, Le TQ, Yano M (2009) Host  
493 envelope glycoprotein processing proteases are indispensable for entry into human cells by  
494 seasonal and highly pathogenic avian influenza viruses. *J Mol Genet Med* 3: 167-175.  
495 doi:10.4172/1747-0862.1000029
- 496 Kim DR, Sharmin S, Inoue M, Kido H (2001) Cloning and expression of novel mosaic serine  
497 proteases with and without a transmembrane domain from human lung. *Biochim Biophys Acta*  
498 1518: 204-209. doi:10.1016/s0167-4781(01)00184-1
- 499 Kishimoto M, Uemura K, Sanaki T, Sato A, Hall WW, Kariwa H, Orba Y, Sawa H, Sasaki M  
500 (2021) TMPRSS11D and TMPRSS13 activate the SARS-CoV-2 spike protein. *Viruses* 13: 384.  
501 doi:10.3390/v13030384

- 502 Kitamoto Y, Yuan X, Wu Q, McCourt DW, Sadler JE (1994) Enterokinase, the initiator of  
503 intestinal digestion, is a mosaic protease composed of a distinctive assortment of domains. *Proc*  
504 *Natl Acad Sci U S A* 91: 7588-7592. doi:10.1073/pnas.91.16.7588
- 505 Kyrieleis OJ, Huber R, Ong E, Oehler R, Hunter M, Madison EL, Jacob U (2007) Crystal structure  
506 of the catalytic domain of DESC1, a new member of the type II transmembrane serine proteinase  
507 family. *FEBS J* 274: 2148-2160. doi:10.1111/j.1742-4658.2007.05756.x
- 508 Laskowski RA, Swindells MB (2011) LigPlot+: multiple ligand-protein interaction diagrams for  
509 drug discovery. *J Chem Inf Model* 51: 2778-2786. doi:10.1021/ci200227u
- 510 Lee CW, Swayne DE, Linares JA, Senne DA, Suarez D (2005) H5N2 avian influenza outbreak in  
511 Texas in 2004: the first highly pathogenic strain in the United States in 20 years? *J Virol* 79:  
512 11412-11421. doi:10.1128/JVI.79.17.11412-11421.2005
- 513 Lovell SC, Davis IW, Arendall WB, 3rd, de Bakker PI, Word JM, Prisant MG, Richardson JS,  
514 Richardson DC (2003) Structure validation by C $\alpha$  geometry:  $\varphi$ ,  $\psi$  and C $\beta$  deviation. *Proteins* 50:  
515 437-450. doi:10.1002/prot.10286
- 516 Lu D, Fütterer K, Korolev S, Zheng X, Tan K, Waksman G, Sadler JE (1999). Crystal structure of  
517 enteropeptidase light chain complexed with an analog of the trypsinogen activation peptide. *J*  
518 *Mol Biol* 292: 361–373. doi:10.1006/jmbi.1999.3089
- 519 Murray AS, Varela FA, Hyland TE, Schoenbeck AJ, White JM, Tanabe LM, Todi SV, List K  
520 (2017) Phosphorylation of the type II transmembrane serine protease, TMPRSS13, in hepatocyte  
521 growth factor activator inhibitor-1 and -2-mediated cell-surface localization. *J Biol Chem* 292:  
522 14867–14884. doi:10.1074/jbc.M117.775999
- 523 Murshudov GN, Skubák P, Lebedev AA, Pannu NS, Steiner RA, Nicholls RA, Winn MD, Long F,  
524 Vagin AA (2011) *REFMAC5* for the refinement of macromolecular crystal structures. *Acta*  
525 *Crystallogr D Biol Crystallogr*, 67: 355-367. doi:10.1107/S0907444911001314
- 526 Ohler A, Becker-Pauly C (2012) TMPRSS4 is a type II transmembrane serine protease involved in  
527 cancer and viral infections. *Biol Chem* 393: 907-914. doi:10.1515/hsz-2012-0155
- 528 Ojala JR, Pikkarainen T, Tuuttila A, Sandalova T, Tryggvason K (2007) Crystal structure of the  
529 cysteine-rich domain of scavenger receptor MARCO reveals the presence of a basic and an  
530 acidic cluster that both contribute to ligand recognition. *J Biol Chem* 282: 16654-16666.  
531 doi:10.1074/jbc.M701750200
- 532 Okumura Y, Takahashi E, Yano M, Ohuchi M, Daidoji T, Nakaya T, Böttcher E, Garten W, Klenk  
533 HD, Kido H (2010) Novel Type II Transmembrane Serine Proteases, MSPL and TMPRSS13,

- 534 Proteolytically Activate Membrane Fusion Activity of the Hemagglutinin of Highly Pathogenic  
535 Avian Influenza Viruses and Induce Their Multicycle Replication. *J Virol* 84: 5089-5096.  
536 doi:10.1128/JVI.02605-09
- 537 Pathak M, Wong SS, Dreveny I, Emsley J (2013) Structure of plasma and tissue kallikreins.  
538 *Thromb Haemost* 110: 423-433. doi:10.1160/TH12-11-0840
- 539 Perona JJ, Craik CS (1997) Evolutionary Divergence of Substrate Specificity within the  
540 Chymotrypsin-like Serine Protease Fold. *J Biol Chem* 272: 29987-29990.  
541 doi:10.1074/jbc.272.48.29987
- 542 Remacle AG, Shiryayev SA, Oh ES, Cieplak P, Srinivasan A, Wei G, Liddington RC, Ratnikov BI,  
543 Parent A, Desjardins R, et al. (2008) Substrate cleavage analysis of furin and related proprotein  
544 convertases. *J Biol Chem* 283: 20897-20906. doi:10.1074/jbc.M803762200
- 545 Šali R, Blundell TL (1993) Comparative protein modelling by satisfaction of spatial restraints. *J*  
546 *Mol Biol* 234: 779-815. doi:10.1006/jmbi.1993.1626
- 547 Sarrias MR, Grønlund J, Padilla O, Madsen J, Holmskov U, Lozano F (2004) The Scavenger  
548 Receptor Cysteine-Rich (SRCR) domain: an ancient and highly conserved protein module of the  
549 innate immune system. *Crit Rev Immunol* 24: 1-37. doi:10.1615/critrevimmunol.v24.i1.10
- 550 Shi W, Fan W, Bai J, Tang Y, Wang L, Jiang Y, Tang L, Liu M, Cui W, Xu Y, et al. (2017)  
551 TMPRSS2 and MSPL Facilitate Trypsin-Independent Porcine Epidemic Diarrhea Virus Replication  
552 in Vero Cells. *Viruses* 9: 114. doi:10.3390/v9050114
- 553 Siezen RJ, Leunissen JA (1997) Subtilases: the superfamily of subtilisin-like serine proteases.  
554 *Protein Sci* 6: 501-523. doi:10.1002/pro.5560060301
- 555 Simeonov P, Zahn M, Sträter N, Zuchner T (2012) Crystal structure of a supercharged variant of  
556 the human enteropeptidase light chain. *Proteins* 80: 1907-1910. doi:10.1002/prot.24084.
- 557 Somoza JR, Ho JD, Luong C, Ghate M, Sprengeler PJ, Mortara K, Shrader WD, Sperandio D,  
558 Chan H, McGrath ME, et al. (2003) The Structure of the Extracellular Region of Human Hepsin  
559 Reveals a Serine Protease Domain and a Novel Scavenger Receptor Cysteine-Rich (SRCR)  
560 Domain. *Structure*, 11: 1123-1131. doi:10.1016/S0969-2126(03)00148-5
- 561 Stieneke-Gröber A, Vey M, Angliker H, Shaw E, Thomas G, Roberts C, Klenk HD, Garten W  
562 (1992) Influenza virus hemagglutinin with multibasic cleavage site is activated by furin, a  
563 subtilisin-like endoprotease. *EMBO J* 11: 2407-2414. doi:10.1002/j.1460-  
564 2075.1992.tb05305.x



- 565 Stubbs MT, Renatus M, Bode W (1998) An active zymogen: unravelling the mystery of tissue-  
566 type plasminogen activator. *Biol Chem* 379: 95-103. doi:10.1515/bchm.1998.379.2.95
- 567 Szabo R, Bugge TH (2008) Type II transmembrane serine proteases in development and disease.  
568 *Int J Biochem Cell Biol* 40: 1297-1316. doi:10.1016/j.biocel.2007.11.013
- 569 Szabo R, Bugge TH (2011) Membrane-anchored serine proteases in vertebrate cell and  
570 developmental biology. *Annu Rev Cell Dev Biol* 27: 213-235. doi:10.1146/annurev-cellbio-  
571 092910-154247
- 572 Tang J, Yu CL, Williams SR, Springman E, Jeffery D, Sprengeler PA, Estevez A, Sampang J,  
573 Shrader W, Spencer J, et al. (2005) Expression, crystallization, and three-dimensional structure  
574 of the catalytic domain of human plasma kallikrein. *J Biol Chem* 280: 41077–41089.  
575 doi:10.1074/jbc.M506766200
- 576 Thomas G (2002) Furin at the cutting edge: from protein traffic to embryogenesis and disease.  
577 *Nat Rev Mol Cell Biol* 3: 753-766. doi:10.1038/nrm934
- 578 Thompson JD, Higgins DG, Gibson TJ (1994) CLUSTAL W: improving the sensitivity of progressive  
579 multiple sequence alignment through sequence weighting, position-specific gap penalties and  
580 weight matrix choice. *Nucl Acids Res* 22: 4673–4680. doi:10.1093/nar/22.22.4673
- 581 Vagin A, Teplyakov A (2010) Molecular replacement with MOLREP. *Acta Crystallogr D Biol*  
582 *Crystallogr* 66: 22-25. doi:10.1107/S0907444909042589
- 583 Wattenhofer M, Sahin-Calapoglu N, Andreasen D, Kalay E, Caylan R, Braillard B, Fowler-  
584 Jaeger N, Reymond A, Rossier BC, Karaguzel A, et al. (2005) A novel TMPRSS3 missense  
585 mutation in a DFNB8/10 family prevents proteolytic activation of the protein. *Hum Genet* 117:  
586 528-535. doi:10.1007/s00439-005-1332-x
- 587 Zmora P, Blazejewska P, Moldenhauer AS, Welsch K, Nehlmeier I, Wu Q, Schneider H, Pöhlmann  
588 S, Bertram S (2014) DESC1 and MSPL activate influenza A viruses and emerging coronaviruses  
589 for host cell entry. *J Virol* 88: 12087-12097. doi:10.1128/JVI.01427-14

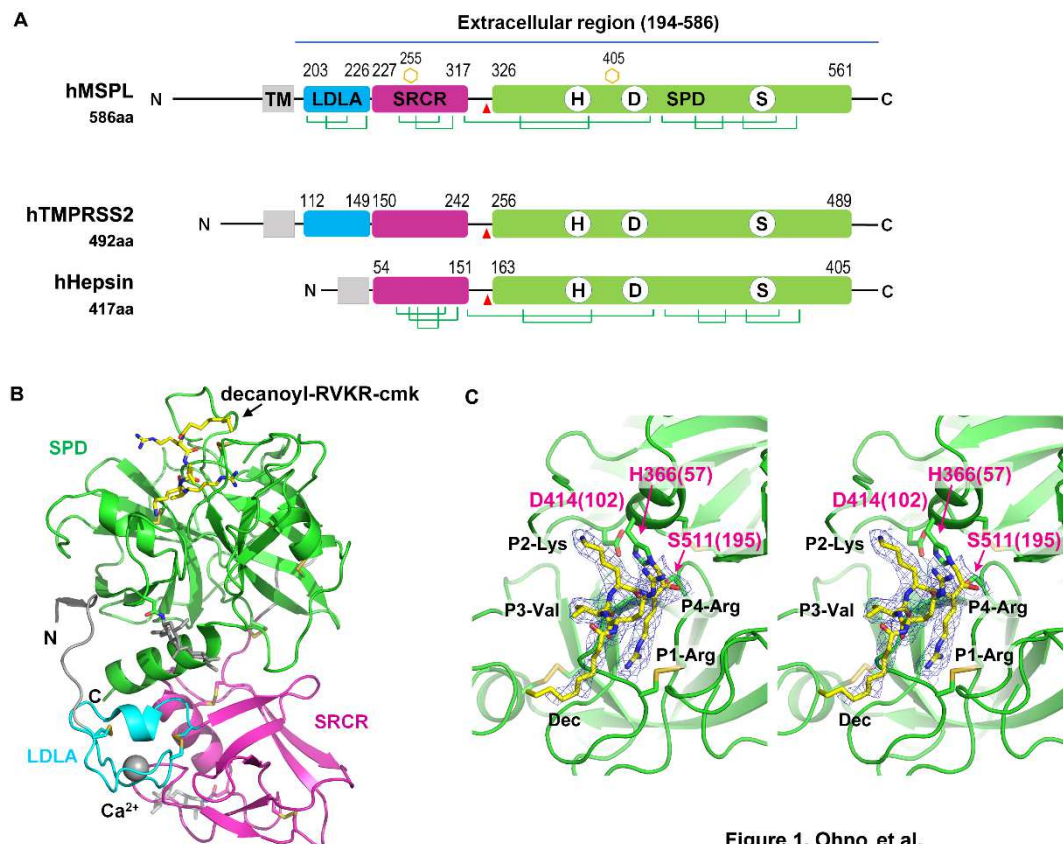

Figure 1. Ohno et al.

590

591 **Figure 1. Overall structure of the human MSPL extracellular domain.**

592 **(A)** Schematic illustration of full-length human MSPL. Human MSPL is composed of a  
 593 cytoplasmic region (1-165), transmembrane helix (166-186), truncated LDL-receptor  
 594 class A (LDLA) domain (203-226), scavenger receptor cysteine-rich (SRCR) domain (227-  
 595 317), and serine-protease domain (SPD) (326-561). Human MSPL is autocleaved at  
 596 after the Arg325 (red arrowhead) to generate the mature protein form. *N*-glycosylated  
 597 Asn observed in the crystal structure are shown as orange hexagons. Disulfide bonds  
 598 are shown as green lines. To compare the representative proteins of hepsin/TMPRSS  
 599 family, human TMPRSS2 and hepsin are also shown. **(B)** Ribbon representation of the  
 600 crystal structure of the human MSPL extracellular region covalently bonded with  
 601 decanoyl-RVKR-cmk (yellow stick model). LDLA domain (cyan), SRCR domain  
 602 (magenta), and SPD (green) are shown. LDLA domain binds  $\text{Ca}^{2+}$  in the center of the  
 603 loop. The N-terminal region (194-196) interacts with SPD by making a  $\beta$ -sheet. Two *N*-  
 604 glycans were observed at Asn255 and Asn405 (white stick model). **(C)** A close-up view  
 605 of bound decanoyl-RVKR-cmk inhibitor and the catalytic triad with the wall-eyed stereo

606 presentation. Numbers in parentheses indicate the corresponding residue number of  
607 chymotrypsin. The refined 2Fo-Fc electron density map (contoured at  $> 1\sigma$ ) of the  
608 inhibitor is shown.

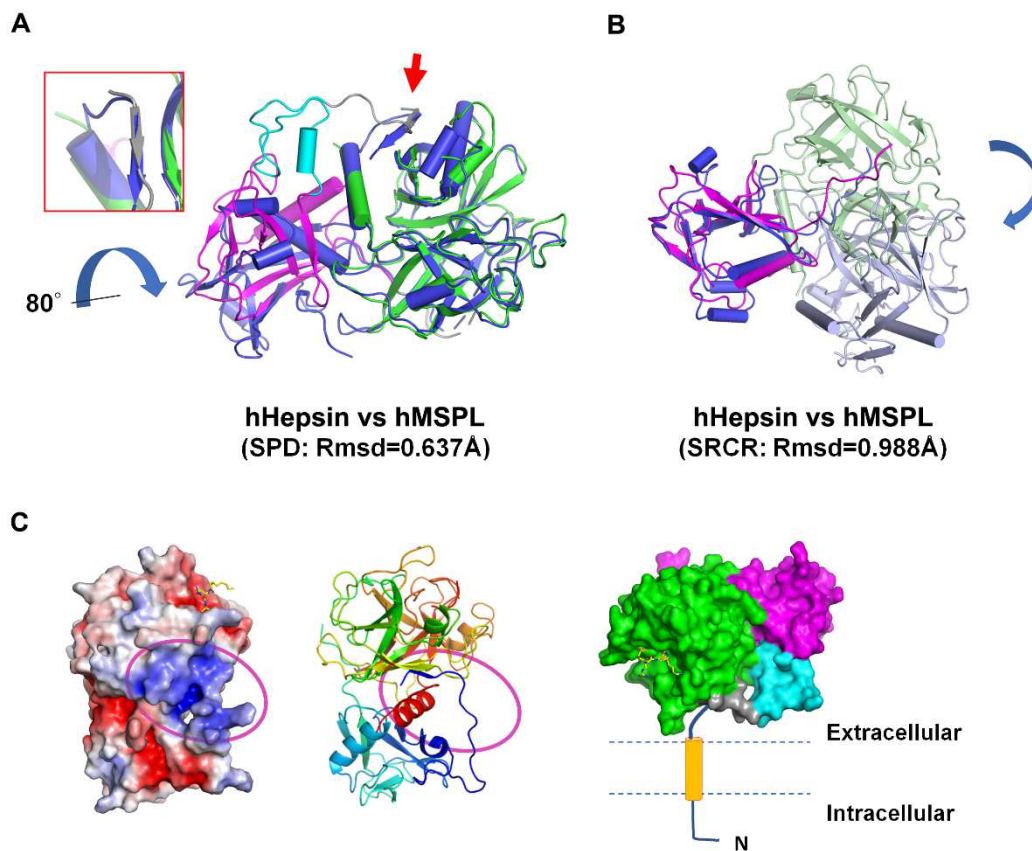

Figure 2. Ohno et al.

609

610 **Figure 2. Comparison of human MSPL and hepsin.**

611 **(A)** Human Hepsin (coloured in marine blue) and human MSPL (coloured in cyan  
612 (LDLA), magenta (SRCR), and green (SPD)) were superposed with the SPD. The RMSD  
613 value is 0.637 Å calculated with 197 C $\alpha$  atom positions. A  $\beta$ -sheet interaction of the N-  
614 terminus and SPD in MSPL is replaced by the C-terminus in hepsin (red arrow and  
615 close-up view in the red box). The hepsin SRCR domain is rotated by about 80° relative  
616 to that of human MSPL. **(B)** Human Hepsin (coloured in blue (SRCR) and pale blue  
617 (SPD)) and human MSPL (coloured in magenta (SRCR) and pale green (SPD)) were  
618 superposed with the SRCR domain. The RMSD value is 0.988 Å calculated with 59 C $\alpha$   
619 atom positions. **(C)** (Left) The electrostatic surface potential of the human MSPL  
620 extracellular domain. A characteristic positively-charged patch (magenta oval),  
621 composed of Arg196, Lys198, Lys218, Lys220, and Arg561, is thought to act as a  
622 contact surface for the cell membrane. The potential map is coloured from red (-5kT/e)  
623 to blue (+5kT/e). (Middle) A ribbon model of human MSPL is shown with the same  
624 orientation. (Right) A putative model of the membrane-anchored full-length human

625 MSPL coloured with green (SPD), cyan (LDLA), magenta (SRCR), and orange  
626 (transmembrane domain).

627

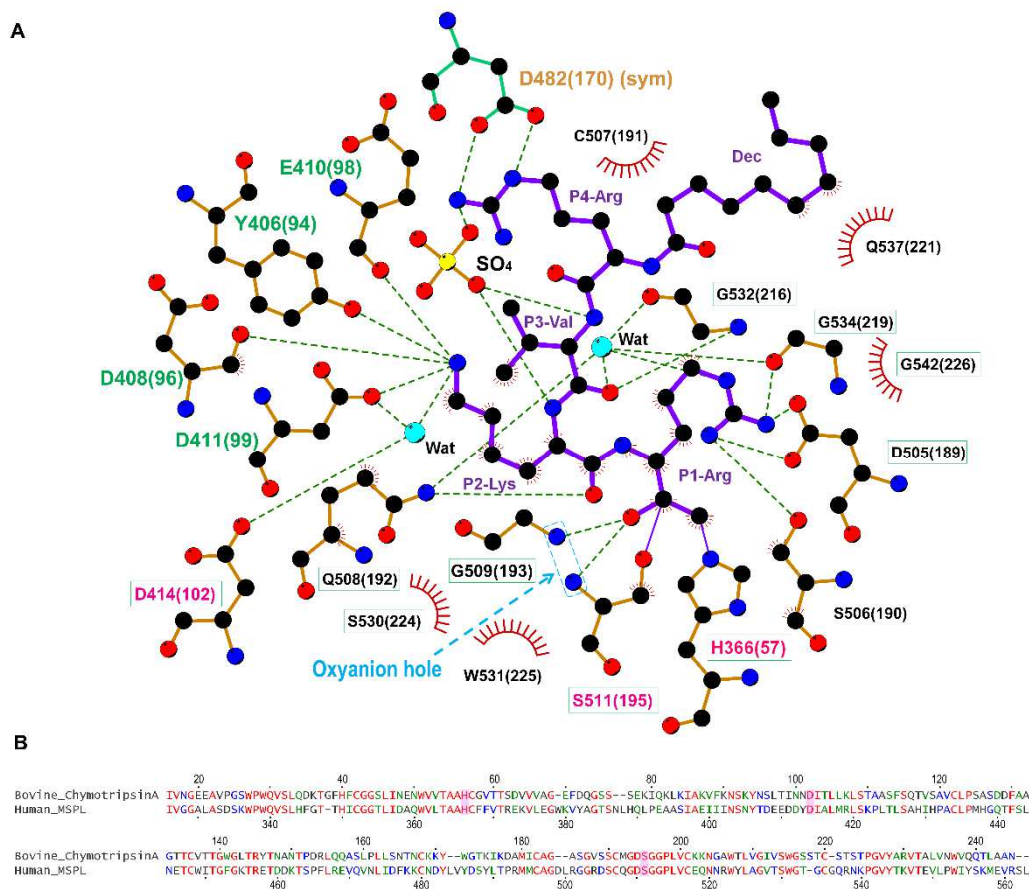

Figure 3. Ohno et al.

628

629 **Figure 3. Interaction of decanoyl-RVKR-cmk inhibitor with human MSPL.**

630 **(A)** The SPD of human MSPL and decanoyl-RVKR-cmk are shown in orange and purple,  
 631 respectively. Nitrogen atoms, blue; oxygen atoms, red; carbon atoms, black; sulfur  
 632 atoms, yellow. Dashed lines represent hydrogen bonds. Red semi-circles with radiating  
 633 spokes denote the residues of the human MSPL involved in hydrophobic contacts with  
 634 decanoyl-RVKR-cmk. Cyan spheres denote water molecules. Light-blue dashed  
 635 rectangle denotes the oxyanion hole. The catalytic triad of three amino acids is  
 636 highlighted in magenta. The residues that is interacted with P2-Lys and P4-Arg are  
 637 highlighted in green and orange, respectively. Conserved residues among human  
 638 MSPL, TMPRSS2-4, and hepsin are highlighted in green boxes. The figure was prepared  
 639 with LigPlot+ (Laskowski & Swindells, 2011). **(B)** Sequence alignment of bovine  $\alpha$ -  
 640 chymotrypsin and SPD of human MSPL. The catalytic triad is highlighted as magenta.

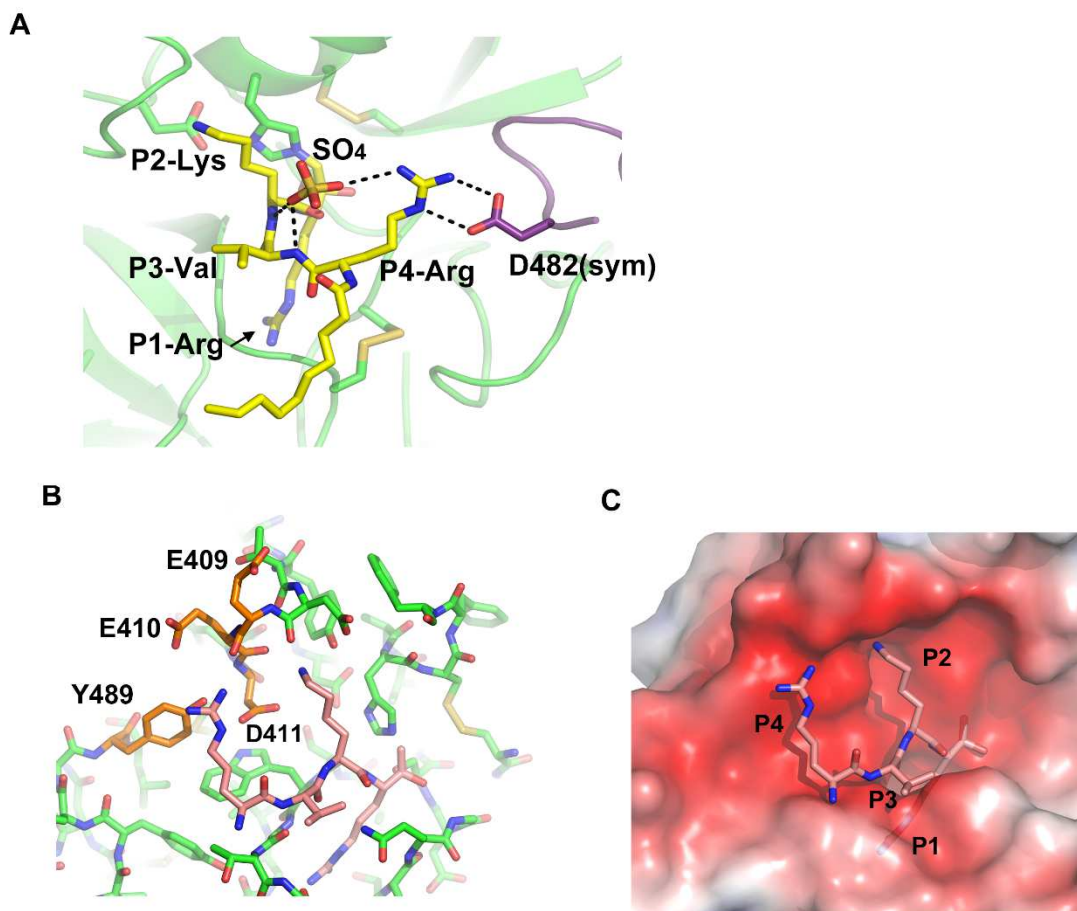

Figure 4. Ohno et al.

641

642 **Figure 4. Putative model of RVKR peptide bound to human MSPL.**

643 **(A)** Side chain of P4-Arg interacts with a sulfate and Asp482 in a symmetry-related  
644 subunit (purple). **(B)** Putative RVKR peptide was modelled with acetyl-KQLR-cmk  
645 structure bound to human hepsin (PDB entry: 1Z8G) as template. P4-Arg interacts with  
646 acidic residues in the 99-loop (Glu409, Glu410, and Asp411) and with Tyr489. **(C)**  
647 Electrostatic surface potential of the MSPL SPD with the putative RVKR peptide (stick  
648 model in rose red). The potential map is coloured from red (-5kT/e) to blue (+5kT/e).

649

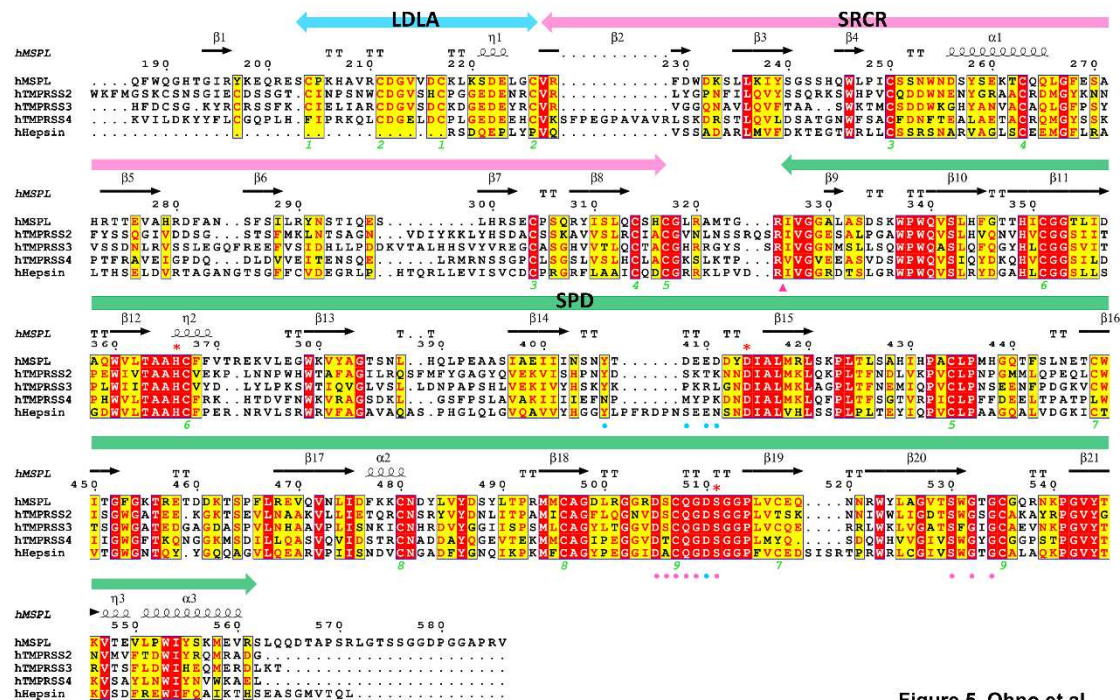

Figure 5. Ohno et al.

650

651 **Figure 5. Multiple sequence alignment of the human MSPL extracellular region with**  
 652 **members of the hepsin/TMPRSS subfamily.**

653 The extracellular region of human MSPL (187-586), human TMPRSS2 (110-492), human  
 654 TMPRSS3 (70-454), human TMPRSS4 (55-437), and human hepsin (50-417) aligned by  
 655 *Clustal W* program (Thompson et al, 1994), followed by colouring with *ESPRIP*T (Gouet  
 656 et al, 2003). Red asterisk indicates the catalytic triad. The amino acid sequences were  
 657 obtained from UniProtKB with the id code of human MSPL (UniProt:Q9BYE2), human  
 658 TMPRSS2 (UniProt:O15393), human TMPRSS3 (UniProt:P57727), human TMPRSS4  
 659 (UniProt:Q9NRS4), and human hepsin (UniProt:P05981). The secondary structure  
 660 regions identified in MSPL are indicated. Identical residues are shown in white on red,  
 661 whereas similar residues are shown in red. Pink arrowhead indicates the autocleavage  
 662 site. Pink circles denote residues that interact with the P1 and P2 site of the  
 663 decanoyl-RVKR-cmk inhibitor, respectively. Green numbers denote the disulfide pairing  
 664 of human MSPL.

665



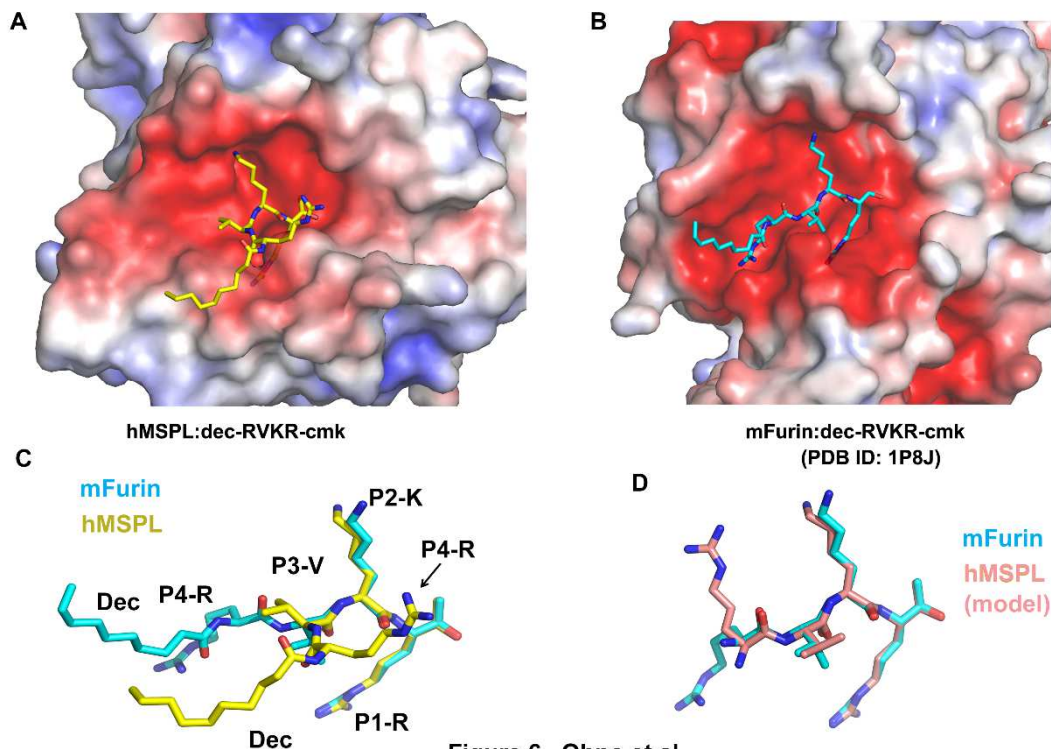

Figure 6. Ohno et al.

666

667 **Figure 6. Conformational differences between the decanoyl-RVKR-cmk inhibitor**  
668 **bound to human MSPL and mouse furin.**

669 **(A)** The human MSPL:decanoyl-RVKR-cmk inhibitor complex. Human MSPL and  
670 inhibitor are shown as an electrostatic surface potential representation and yellow  
671 stick model, respectively. The potential maps are coloured from red (-5kT/e) to blue  
672 (+5kT/e). **(B)** The mouse furin:decanoyl-RVKR-cmk inhibitor complex (PDB entry: 1P8J).  
673 Mouse furin and inhibitor are shown as an electrostatic surface potential  
674 representation and cyan stick model, respectively. The potential maps are coloured  
675 from red (-5kT/e) to blue (+5kT/e). **(C)** Superposition of decanoyl-RVKR-cmk inhibitors  
676 bound to human MSPL and mouse furin. **(D)** Superposition of putative RVKR inhibitors  
677 bound to human MSPL and mouse furin.

678

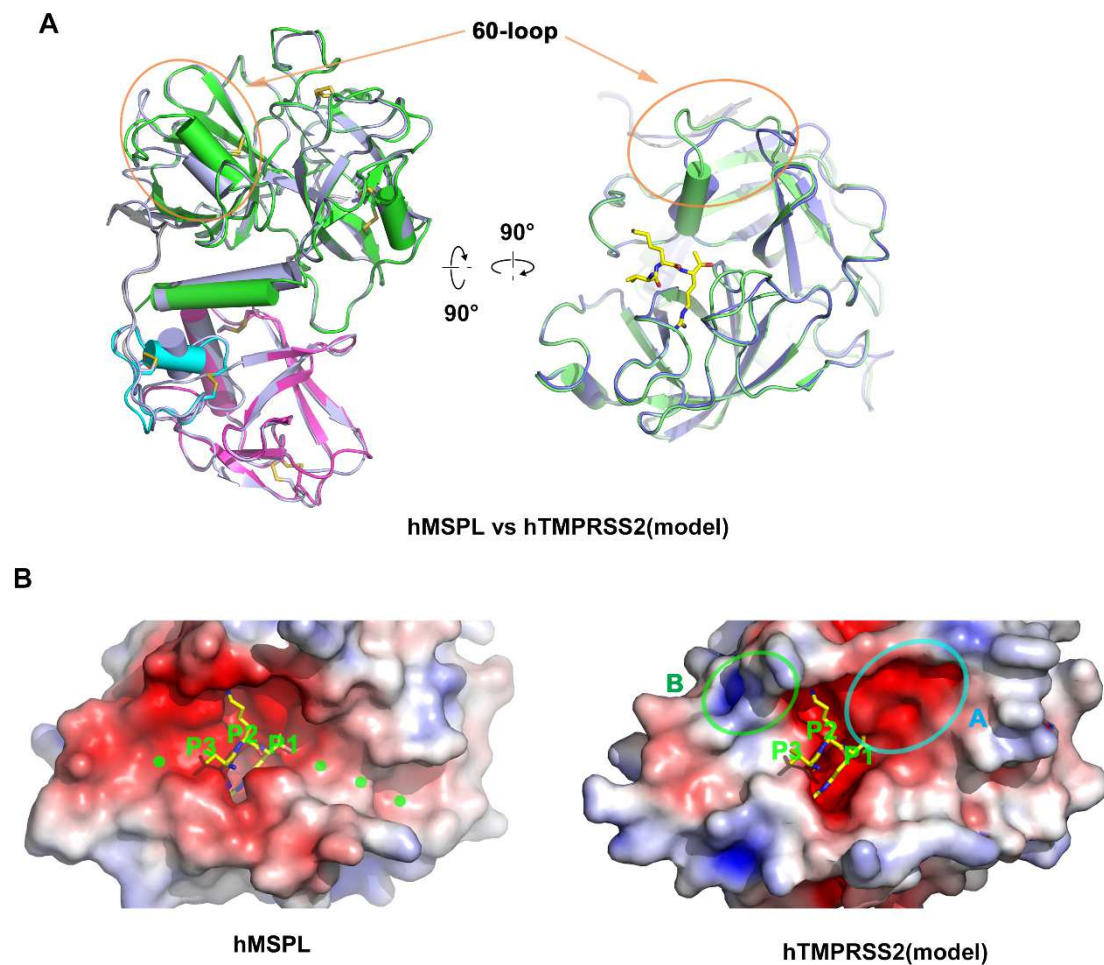

Figure 7. Ohno et al.

679

680 **Figure 7. Homology model analysis of human TMPRSS2.**

681 **(A)** A homology model of human TMPRSS2 (gray ribbon) was built with human MSPL  
682 (LDLA (cyan), SRCR (magenta), and SPD (green)) structure as a template. Superposed  
683 analysis revealed large structural differences at the  $\beta$ 12- $\beta$ 13 loop (60-loop) region  
684 (orange oval). The coordinate of the homology model of human TMPRSS2 is available  
685 from supplementary materials. **(B)** Electrostatic surface potential of human MSPL and  
686 human TMPRSS2 SPD. (Left panel) Human MSPL has a narrow groove that fits with the  
687 stretched peptide chain (green dots). (Right panel) Human TMPRSS2 has a wider cleft  
688 at the P1' binding site (highlighted by the cyan oval A). A positively-charged area  
689 derived from Lys225 is indicated by the green oval B. The potential map is coloured  
690 from red (-5kT/e) to blue (+5kT/e).

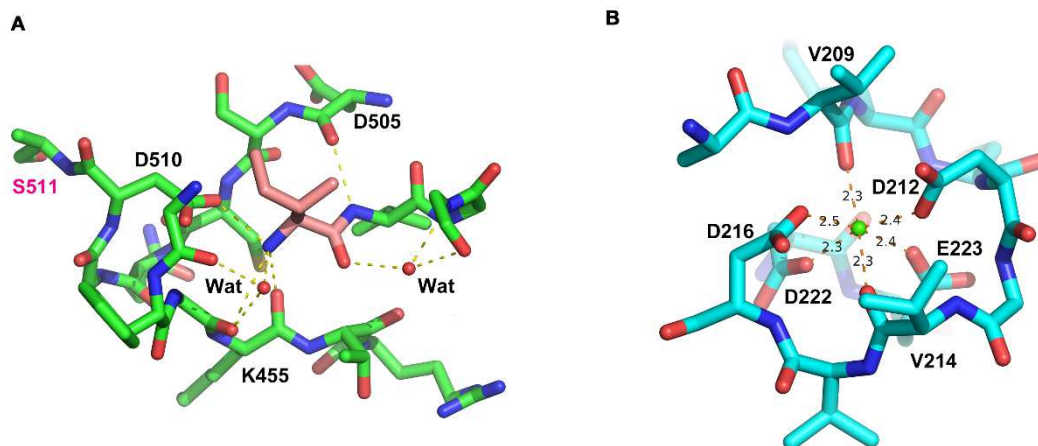

Figure S1. Ohno et al.

691

692 **Figure S1.**

693 **(A)** The interaction of Ile326(16) (coloured in rose red). Ile326(16) interacts with the  
694 side chain of Asp510(194), backbone of Lys455(143), and two water molecules. **(B)**  
695 Calcium ion bound at the loop in the LDLA domain. The calcium ion interacts with  
696 octahedral coordinates to Val209, Asp212, Val214, Asp216, Asp222, and Glu223.

697

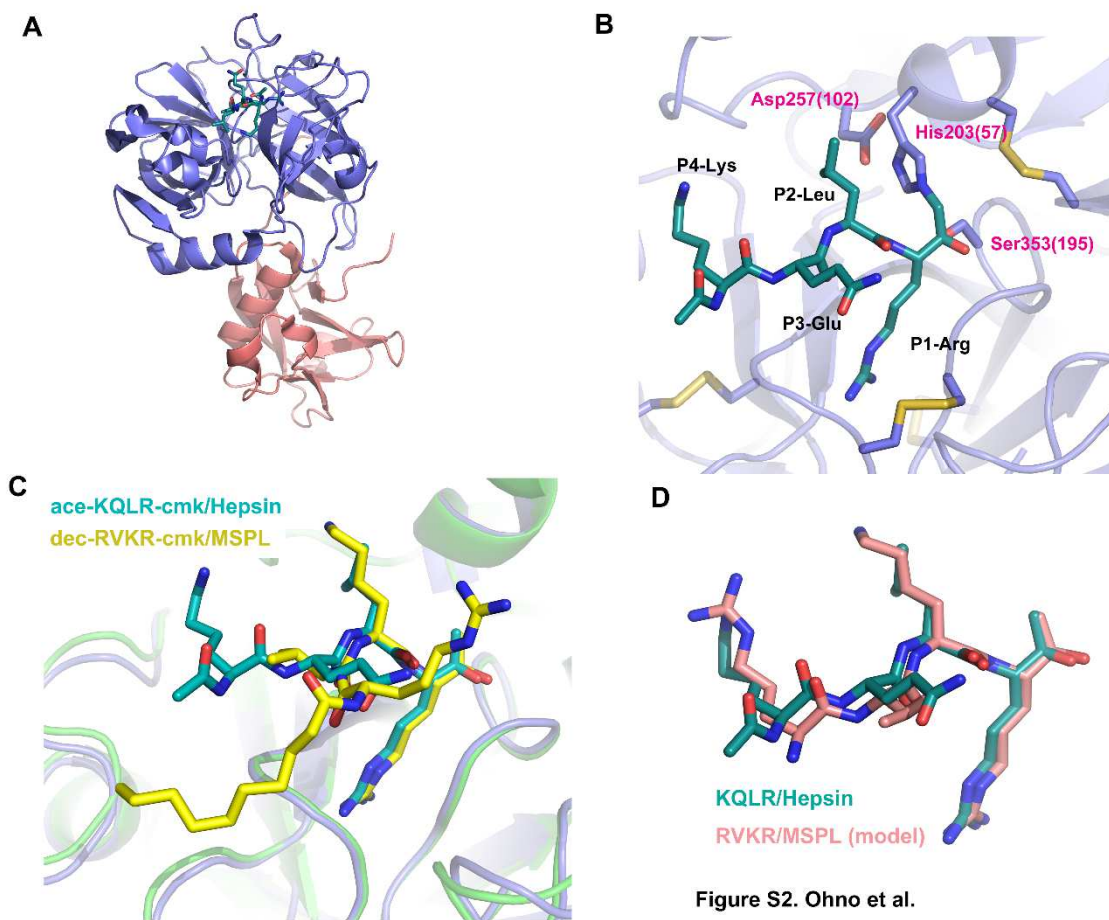

698

699 **Figure S2. Putative model-building of RVKR peptide using Hepsin/KQLR as the**  
700 **template.**

701 **(A)** Overall structure of Hepsin/KQLR (PDB entry:1Z8G). Ribbon representation of  
702 hepsin coloured with rose red (SRCR domain) and indigo blue (SPD). The covalently-  
703 bound inhibitor (acetyl-KQLR-cmk) is shown as a stick model. **(B)** A close-up view of  
704 bound acetyl-KQLR-cmk inhibitor (turquoise) and the catalytic triad. Numbers in  
705 parentheses indicate the corresponding residue number of chymotrypsin. **(C)**  
706 Superposition of acetyl-KQLR-cmk and decanoyl-RVKR-cmk. Hepsin and MSPL were  
707 superposed with SPDs as in Fig2A. **(D)** Superposition of acetyl-KQLR-cmk and putative  
708 model of RVKR-cmk. The putative RVKR model was built by matching the phi/psi  
709 backbone angles of P3 and P4 with the KQLR inhibitor.

710 **Table S1. Data collection and model refinement statistics.**

|                                                  | Human MSPL (193-563)/decanoyl-RVKR-cmk                                                                                              |
|--------------------------------------------------|-------------------------------------------------------------------------------------------------------------------------------------|
| <b>Data Collection</b> <sup>a</sup>              |                                                                                                                                     |
| X-ray source                                     | PF-AR NE3A                                                                                                                          |
| Space group                                      | $P2_12_12_1$                                                                                                                        |
| Unit cell parameters                             | $a = 55.84 \text{ \AA}, b = 62.40 \text{ \AA}, c = 171.63 \text{ \AA},$<br>$\alpha = 90^\circ, \beta = 90^\circ, \gamma = 90^\circ$ |
| Wavelength, $\text{\AA}$                         | 1.0000                                                                                                                              |
| Resolution range, $\text{\AA}$                   | 40-2.6 (2.72-2.60)                                                                                                                  |
| No. observed reflections                         | 130,814                                                                                                                             |
| No. unique reflections                           | 19,086                                                                                                                              |
| Multiplicity                                     | 6.9 (7.0)                                                                                                                           |
| Completeness, %                                  | 99.7 (99.6)                                                                                                                         |
| $\langle I \rangle / \langle \sigma(I) \rangle$  | 9.5 (2.5)                                                                                                                           |
| CC $_{1/2}$                                      | 0.995 (0.729)                                                                                                                       |
| $R_{\text{merge}}$ <sup>b</sup>                  | 0.151 (1.012)                                                                                                                       |
| <b>Model Refinement</b>                          |                                                                                                                                     |
| Resolution range, $\text{\AA}$                   | 40-2.6                                                                                                                              |
| No. reflections                                  | 17,570                                                                                                                              |
| $R_{\text{work}} / R_{\text{free}}$ <sup>c</sup> | 0.184 / 0.235                                                                                                                       |
| No. non-H atoms                                  |                                                                                                                                     |
| Protein                                          | 2,911                                                                                                                               |
| Oligosaccharide                                  | 52                                                                                                                                  |
| Inhibitor                                        | 50                                                                                                                                  |
| Ion/water                                        | 36/81                                                                                                                               |
| Average B-factors, $\text{\AA}^2$                |                                                                                                                                     |
| Protein                                          | 35.1                                                                                                                                |
| Oligosaccharide                                  | 58.5                                                                                                                                |
| Inhibitor                                        | 41.3                                                                                                                                |
| Ion/water                                        | 58.0/26.2                                                                                                                           |
| r.m.s deviations                                 |                                                                                                                                     |
| Bond lengths, $\text{\AA}$                       | 0.004                                                                                                                               |
| Bond angles, $^\circ$                            | 1.191                                                                                                                               |
| Ramachandran plot <sup>d</sup> , %               |                                                                                                                                     |
| Favored region                                   | 94.3                                                                                                                                |
| Allowed region                                   | 5.7                                                                                                                                 |
| Outlier region                                   | 0.0                                                                                                                                 |
| PDB entry                                        | 6KD5                                                                                                                                |

711 <sup>a</sup> Highest resolution shell is shown in parentheses.

712 <sup>b</sup>  $R_{\text{merge}} = \sum_{hkl} |I_i - \langle I_i \rangle| / \sum_{hkl} I_i$ , where  $I_i(hkl)$  is the intensity of the  $i$ th measurement of reflection  $hkl$  and  
713  $\langle I_i(hkl) \rangle$  is the average value of  $I_i(hkl)$  for all  $i$  measurements.

714 <sup>c</sup>  $R_{\text{work}} = \sum_{hkl} ||F_{\text{obs}}| - |F_{\text{calc}}|| / \sum_{hkl} |F_{\text{obs}}|$ . 8% of the reflections were excluded for  $R_{\text{free}}$  calculation.

715 <sup>d</sup> Analyzed with the program *Rampage* (Lovell et al, 2003).

716
